# Supplementary material for: Carbapenem-Resistant Citrobacter spp. as an Emerging Concern in the Hospital-Setting: Results From a Genome-Based Regional Surveillance Study
Source: PubMed Central journal article supplement (PMC8632029; doi:10.3389/fcimb.2021.744431), 2021-11-11
Supplement: DataSheet_1.pdf [file DataSheet_1.pdf]

Supplementary Table S1. Origin of the carbapenem-resistant *Citrobacter spp.* isolates

| Isolate ID    | Patient age | Gender | Year | Hospital ID | Species                 | Carbapene mase producer | Culture site           | Clinical syndrome | Outbreak associated | Polymicrobial culture                   |
|---------------|-------------|--------|------|-------------|-------------------------|-------------------------|------------------------|-------------------|---------------------|-----------------------------------------|
| bk18035705    | 79          | F      | 2018 | 3770        | <i>C. freundii</i>      | yes                     | Blood                  | Infection         | I                   |                                         |
| NRZ_29912     | 72          | F      | 2016 | 3331        | <i>C. freundii</i>      | yes                     | Rectal swab            | Colonization      |                     |                                         |
| NRZ-31131     | 75          | M      | 2016 | 3331        | <i>C. freundii</i>      | yes                     | Rectal swab            | Colonization      |                     |                                         |
| NRZ-31836     | 72          | M      | 2017 | 3331        | <i>C. freundii</i>      | yes                     | Rectal swab            | Colonization      |                     |                                         |
| NRZ-37119     | 64          | M      | 2017 | 3001        | <i>C. freundii</i>      | yes                     | Swab screening         | Colonization      |                     | <i>K. michiganensis</i>                 |
| NRZ-37969     | 73          | M      | 2017 | 3331        | <i>C. freundii</i>      | yes                     | Rectal swab            | Colonization      |                     |                                         |
| NRZ-38718     | 82          | F      | 2017 | 3331        | <i>C. freundii</i>      | yes                     | Rectal swab            | Colonization      |                     |                                         |
| NRZ-38954     | 59          | M      | 2017 | 3331        | <i>C. freundii</i>      | yes                     | Rectal swab            | Colonization      |                     |                                         |
| NRZ-45233     | 89          | F      | 2018 | 3000        | <i>C. freundii</i>      | yes                     | Urine                  | Infection         | II                  |                                         |
| sc17238571    | 52          | M      | 2017 | 3770        | <i>C. freundii</i>      | yes                     | Rectal swab            | Colonization      |                     |                                         |
| sc17286987    | 46          | M      | 2017 | 3770        | <i>C. freundii</i>      | yes                     | Rectal swab            | Colonization      | I                   |                                         |
| sc18364826    | 63          | M      | 2018 | 3770        | <i>C. freundii</i>      | yes                     | Rectal swab            | Colonization      | I                   |                                         |
| sc18407397    | 59          | F      | 2018 | 3770        | <i>C. portucalensis</i> | yes                     | Rectal swab            | Colonization      |                     |                                         |
| sc18412584    | 68          | M      | 2018 | 3770        | <i>C. freundii</i>      | yes                     | Rectal swab            | Colonization      |                     |                                         |
| sc18412783    | 68          | M      | 2018 | 3770        | <i>C. portucalensis</i> | yes                     | Rectal swab            | Colonization      |                     |                                         |
| sc19444294    | 80          | M      | 2019 | 3770        | <i>C. freundii</i>      | yes                     | Nose throat swab       | Colonization      |                     |                                         |
| sc19446287    | 93          | F      | 2019 | 3770        | <i>C. freundii</i>      | yes                     | Rectal swab            | Colonization      |                     |                                         |
| Survcare036   | 63          | M      | 2018 | 3560        | <i>C. freundii</i>      | yes                     | Rectal swab            | Colonization      |                     |                                         |
| Survcare050   | 44          | F      | 2017 | 3750        | <i>C. freundii</i>      | yes                     | Abscess swab           | Infection         |                     |                                         |
| Survcare080   | 69          | M      | 2016 | 3750        | <i>C. freundii</i>      | yes                     | Rectal swab            | Colonization      |                     |                                         |
| Survcare083-1 | 74          | M      | 2016 | 3750        | <i>C. freundii</i>      | yes                     | Groin swab             | Colonization      |                     |                                         |
| Survcare092   | 75          | M      | 2018 | 3331        | <i>C. freundii</i>      | yes                     | Rectal swab            | Colonization      | I                   |                                         |
| Survcare120   | 61          | M      | 2018 | 3560        | <i>C. freundii</i>      | yes                     | Abdominal swab         | Infection         | II                  |                                         |
| Survcare132   | 70          | M      | 2018 | 3430        | <i>C. freundii</i>      | yes                     | Rectal swab            | Colonization      |                     |                                         |
| Survcare137   | 66          | F      | 2018 | 3750        | <i>C. freundii</i>      | yes                     | Rectal swab            | Colonization      |                     |                                         |
| Survcare150   | 68          | M      | 2018 | 3941        | <i>C. freundii</i>      | yes                     | Rectal swab            | Colonization      |                     |                                         |
| Survcare154   | 58          | M      | 2018 | 3520        | <i>C. freundii</i>      | yes                     | Rectal swab            | Colonization      |                     |                                         |
| Survcare160   | 77          | M      | 2018 | 3331        | <i>C. freundii</i>      | not                     | Rectal swab            | Colonization      |                     |                                         |
| Survcare161   | 75          | M      | 2018 | 4000        | <i>C. freundii</i>      | not                     | Urine                  | Infection         | II                  |                                         |
| Survcare162   | 75          | M      | 2018 | 4000        | <i>C. freundii</i>      | yes                     | Urethral swab          | Infection         | II                  |                                         |
| Survcare163   | 61          | M      | 2018 | 4000        | <i>C. freundii</i>      | yes                     | Intra-abdominale       | Infection         | II                  |                                         |
| Survcare165   | 65          | M      | 2018 | 4000        | <i>C. freundii</i>      | yes                     | Urine                  | Infection         | II                  |                                         |
| Survcare188   | 19          | M      | 2018 | 3521        | <i>C. freundii</i>      | yes                     | Rectal swab            | Colonization      |                     |                                         |
| Survcare235   | 80          | F      | 2019 | 3331        | <i>C. portucalensis</i> | yes                     | Rectal swab            | Colonization      |                     |                                         |
| Survcare239   | 51          | M      | 2019 | 3430        | <i>C. freundii</i>      | yes                     | Rectal swab            | Colonization      |                     |                                         |
| Survcare242   | 61          | M      | 2019 | 3520        | <i>C. freundii</i>      | yes                     | transurethral catheter | Not variable data |                     |                                         |
| Survcare247   | 76          | M      | 2019 | 3060        | <i>C. freundii</i>      | yes                     | Swab perineum          | Not variable data |                     |                                         |
| Survcare252   | 85          | M      | 2019 | 3820        | <i>C. freundii</i>      | yes                     | Rectal swab            | Colonization      | II                  |                                         |
| Survcare306   | 78          | M      | 2019 | 3331        | <i>C. freundii</i>      | yes                     | Rectal swab            | Colonization      |                     |                                         |
| Survcare308   | 0           | M      | 2019 | 3330        | <i>C. portucalensis</i> | yes                     | Rectal swab            | Colonization      |                     |                                         |
| Survcare311   | 79          | F      | 2019 | 3001        | <i>C. freundii</i>      | yes                     | Rectal swab            | Colonization      |                     |                                         |
| Survcare314   | 90          | M      | 2019 | 3560        | <i>C. freundii</i>      | yes                     | Rectal swab            | Colonization      | III                 |                                         |
| Survcare315   | 66          | M      | 2019 | 3560        | <i>C. freundii</i>      | yes                     | Rectal swab            | Colonization      | III                 |                                         |
| Survcare316   |             |        | 2018 | 3560        | <i>C. freundii</i>      | yes                     | Hospital environment   |                   | III                 |                                         |
| Survcare320   | 65          | M      | 2019 | 3001        | <i>C. freundii</i>      | yes                     | Wound swab foot        | Infection         |                     |                                         |
| Survcare336   | 74          | M      | 2019 | 3331        | <i>C. braakii</i>       | yes                     | Rectal swab            | Colonization      |                     | <i>K. pneumoniae</i> and <i>E. coli</i> |
| Survcare347   | 58          | M      | 2019 | 3331        | <i>C. koseri</i>        | yes                     | Rectal swab            | Colonization      |                     |                                         |
| Survcare396   | 82          | F      | 2019 | 3300        | <i>C. freundii</i>      | yes                     | Rectal swab            | Colonization      |                     |                                         |
| Survcare397   | 79          | M      | 2019 | 4000        | <i>C. koseri</i>        | yes                     | Rectal swab            | Colonization      |                     | <i>K. pneumoniae</i>                    |
| Survcare405   | 71          | M      | 2019 | 3001        | <i>C. freundii</i>      | yes                     | Tracheal secretions    | Infection         |                     | <i>E. coli</i>                          |
| Survcare410   | 85          | M      | 2019 | 3941        | <i>C. freundii</i>      | yes                     | Rectal swab            | Colonization      |                     |                                         |
| Survcare429   | 68          | M      | 2019 | 4000        | <i>C. freundii</i>      | yes                     | Rectal swab            | Colonization      |                     |                                         |
| Survcare457   | 70          | F      | 2019 | 3300        | <i>C. freundii</i>      | yes                     | Rectal swab            | Colonization      |                     |                                         |
| Survcare462   | 64          | F      | 2019 | 3821        | <i>C. braakii</i>       | not                     | Rectal swab            | Colonization      |                     |                                         |
| ur18060060    | 56          | M      | 2018 | 3770        | <i>C. freundii</i>      | yes                     | Urine                  | Infection         | I                   |                                         |
| ur19075683    | 78          | M      | 2019 | 3770        | <i>C. freundii</i>      | Yes                     | Urine                  | Not variable data |                     |                                         |

**Supplementary Table S2. Genome sequencing statistics and accessions**

| Isolate       | Seq-Platform | No. Reads | Average read length | No. Contigs | N50 (bp) | Genome Size (bp) | GC Content (%) | Coverage | BioSample    | Accession       |
|---------------|--------------|-----------|---------------------|-------------|----------|------------------|----------------|----------|--------------|-----------------|
| bk18035705    | MiSeq        | 2030010   | 157.5               | 52          | 2550858  | 5092383          | 52             | 62.7     | SAMN17371780 | JAFHMA000000000 |
| NRZ-29912     | MiSeq        | 972598    | 119.6               | 379         | 25974    | 4964824          | 52             | 23.4     | SAMN17371798 | JAFHMS000000000 |
| NRZ-31131     | MiSeq        | 1463586   | 117.0               | 246         | 50209    | 4967061          | 52             | 34.4     | SAMN17371802 | JAFHMW000000000 |
| NRZ-31836     | NextSeq      | 4072040   | 132.7               | 103         | 189947   | 5184198          | 52             | 104.2    | SAMN17371803 | JAFHMW000000000 |
| NRZ-37119     | NextSeq      | 7422334   | 113.7               | 59          | 692528   | 5077694          | 52             | 166.2    | SAMN17371829 | JAFHNX000000000 |
| NRZ-37969     | NextSeq      | 9415590   | 36.9                | 178         | 89885    | 5183947          | 52             | 67.0     | SAMN17371833 | JAFHOB000000000 |
| NRZ-38718     | MiSeq        | 886134    | 122.6               | 435         | 24473    | 5068436          | 52             | 21.4     | SAMN17371837 | JAFHOF000000000 |
| NRZ-38954     | NextSeq      | 7102658   | 36.9                | 1157        | 11464    | 5442038          | 51             | 48.1     | SAMN17371840 | JAFHOI000000000 |
| NRZ-45233     | NextSeq      | 3078852   | 140.7               | 93          | 192447   | 5503477          | 52             | 78.7     | SAMN17371858 | JAFHPA000000000 |
| sc17238571    | NextSeq      | 5443788   | 116.6               | 114         | 389978   | 5625113          | 52             | 112.8    | SAMN17371862 | JAFHPE000000000 |
| sc17286987    | NextSeq      | 1918496   | 128.0               | 311         | 56024    | 5686868          | 52             | 43.1     | SAMN17371866 | JAFHPD000000000 |
| sc18364826    | MiSeq        | 1380044   | 212.8               | 86          | 181678   | 5078963          | 52             | 57.8     | SAMN17371879 | JAFHPV000000000 |
| sc18407397    | NextSeq      | 18267928  | 119.2               | 140         | 337752   | 5237847          | 52             | 415.7    | SAMN17371886 | JAFHQO00000000  |
| sc18412584    | NextSeq      | 5163230   | 134.6               | 83          | 487805   | 5100306          | 52             | 136.2    | SAMN17371888 | JAFHQM000000000 |
| sc18412783    | NextSeq      | 5509672   | 131.5               | 83          | 170962   | 4997670          | 52             | 144.9    | SAMN17371889 | JAFHQF000000000 |
| sc19444294    | NextSeq      | 7167902   | 127.6               | 80          | 337489   | 5363202          | 51             | 170.5    | SAMN17371900 | JAFHQO00000000  |
| sc19446287    | NextSeq      | 3308700   | 132.0               | 136         | 147833   | 5324169          | 52             | 82.0     | SAMN17371903 | JAFHQO00000000  |
| Survcare036   | MiSeq        | 1442396   | 184.8               | 216         | 77323    | 5525291          | 52             | 48.2     | SAMN17371948 | JAFHSM000000000 |
| Survcare050   | NextSeq      | 2520620   | 122.3               | 196         | 90740    | 5476061          | 52             | 56.2     | SAMN17371962 | JAFHTA000000000 |
| Survcare080   | NextSeq      | 3565214   | 131.6               | 120         | 176463   | 5392833          | 51             | 87.0     | SAMN17372001 | JAFHUN000000000 |
| Survcare083-1 | NextSeq      | 6404240   | 131.1               | 58          | 554586   | 5397907          | 52             | 155.7    | SAMN17372004 | JAFHJQ000000000 |
| Survcare092   | NextSeq      | 2463614   | 127.9               | 124         | 178037   | 5433118          | 51             | 57.9     | SAMN17372014 | JAFHVA000000000 |
| Survcare120   | NextSeq      | 3185962   | 110.0               | 70          | 338383   | 5223944          | 52             | 67.0     | SAMN17372039 | JAFHVV000000000 |
| Survcare132   | NextSeq      | 7832216   | 121.2               | 128         | 350592   | 5659887          | 52             | 167.7    | SAMN17372051 | JAFHWL000000000 |
| Survcare137   | MiSeq        | 2345034   | 175.2               | 124         | 138095   | 5450346          | 52             | 75.3     | SAMN17372053 | JAFHWN000000000 |
| Survcare150   | NextSeq      | 10238604  | 114.8               | 120         | 199532   | 5614486          | 52             | 209.3    | SAMN17372063 | JAFHWX000000000 |
| Survcare154   | NextSeq      | 1160096   | 120.0               | 117         | 122785   | 5530281          | 52             | 25.1     | SAMN17372066 | JAFHXA000000000 |
| Survcare160   | NextSeq      | 1423218   | 116.4               | 212         | 136630   | 5412987          | 51             | 30.6     | SAMN17372072 | JAFHXG000000000 |
| Survcare161   | NextSeq      | 1030790   | 115.3               | 146         | 101906   | 5210629          | 52             | 22.8     | SAMN17372073 | JAFHXH000000000 |
| Survcare162   | NextSeq      | 917716    | 115.4               | 326         | 34672    | 5159728          | 52             | 20.5     | SAMN17372074 | JAFHXI000000000 |
| Survcare163   | NextSeq      | 859732    | 114.4               | 371         | 48045    | 5278687          | 52             | 18.6     | SAMN17372075 | JAFHXJ000000000 |
| Survcare165   | NextSeq      | 24852458  | 118.2               | 94          | 195364   | 5042749          | 52             | 582.5    | SAMN17372077 | JAFHXL000000000 |
| Survcare188   | NextSeq      | 4361332   | 135.9               | 114         | 242797   | 5425346          | 52             | 109.2    | SAMN17372097 | JAFHYE000000000 |
| Survcare235   | MiSeq        | 1412266   | 161.3               | 117         | 109131   | 5083010          | 52             | 44.8     | SAMN17372126 | JAFHZG000000000 |
| Survcare239   | MiSeq        | 4161136   | 162.1               | 123         | 167872   | 5369257          | 52             | 125.6    | SAMN17372130 | JAFHZK000000000 |
| Survcare242   | MiSeq        | 905690    | 140.8               | 113         | 151324   | 5153293          | 52             | 24.7     | SAMN17372133 | JAFHZN000000000 |
| Survcare247   | NextSeq      | 4307898   | 108.7               | 90          | 189762   | 5293350          | 52             | 88.4     | SAMN17372138 | JAFHZS000000000 |
| Survcare252   | NextSeq      | 3717604   | 121.7               | 126         | 156774   | 5301727          | 52             | 85.3     | SAMN17372143 | JAFHZX000000000 |
| Survcare253   | NextSeq      | 5251570   | 119.0               | 168         | 117002   | 4971544          | 50             | 125.7    | SAMN17372992 | JAFHEJ000000000 |
| Survcare306   | MiSeq        | 539460    | 162.3               | 581         | 19524    | 5278427          | 52             | 16.5     | SAMN17372993 | JAFHEK000000000 |
| Survcare311   | NextSeq      | 3324406   | 110.0               | 93          | 279542   | 5382572          | 52             | 67.9     | SAMN17372996 | JAFHEN000000000 |
| Survcare314   | NextSeq      | 758506    | 110.4               | 1013        | 10802    | 5587804          | 52             | 14.9     | SAMN17372999 | JAFHEQ000000000 |
| Survcare315   | MiSeq        | 734976    | 180.9               | 102         | 182471   | 5247961          | 52             | 25.3     | SAMN17373000 | JAFHER000000000 |
| Survcare316   | MiSeq        | 684730    | 165.4               | 105         | 212466   | 5159069          | 52             | 21.9     | SAMN17373001 | JAFHES000000000 |
| Survcare320   | NextSeq      | 2830270   | 113.8               | 108         | 246078   | 5278951          | 52             | 61.0     | SAMN17373003 | JAFHEU000000000 |
| Survcare336   | NextSeq      | 3033486   | 106.8               | 47          | 423121   | 4940785          | 52             | 65.5     | SAMN17373017 | JAFHFI000000000 |
| Survcare347   | NextSeq      | 6452720   | 123.0               | 65          | 425812   | 4884842          | 54             | 162.4    | SAMN17373027 | JAFHFR000000000 |
| Survcare396   | NextSeq      | 1202112   | 111.3               | 213         | 89634    | 5384741          | 52             | 24.8     | SAMN17373064 | JAFHHC000000000 |
| Survcare397   | NextSeq      | 1753432   | 110.0               | 84          | 168380   | 4850364          | 54             | 39.7     | SAMN17373065 | JAFHHD000000000 |
| Survcare405   | NextSeq      | 2511860   | 127.6               | 274         | 54597    | 5195100          | 52             | 61.6     | SAMN17373073 | JAFHHL000000000 |
| Survcare410   | NextSeq      | 2653664   | 124.3               | 111         | 126305   | 5137615          | 52             | 64.2     | SAMN17373078 | JAFHHQ000000000 |
| Survcare429   | NextSeq      | 1325928   | 130.2               | 117         | 166880   | 5289103          | 52             | 32.6     | SAMN17373092 | JAFHIE000000000 |
| Survcare457   | NextSeq      | 7395134   | 117.8               | 124         | 236617   | 5382929          | 51             | 161.8    | SAMN17373116 | JAFHJB000000000 |
| Survcare462   | NextSeq      | 5890684   | 116.6               | 59          | 281554   | 4920770          | 52             | 139.5    | SAMN17373120 | JAFHJF000000000 |
| ur18060060    | NextSeq      | 4269056   | 110.1               | 145         | 316593   | 5523667          | 52             | 85.0     | SAMN17373131 | JAFHJQ000000000 |
| ur19075683    | NextSeq      | 5846848   | 122.9               | 137         | 118396   | 5102860          | 52             | 140.8    | SAMN17373134 | JAFHJT000000000 |

Supplementary Table S3. Genomic characteristics of the *Citrobacter* spp. isolates from 2016 to 2019 in Hesse, Germany

| Isolate      | Species            | MLST type | Plasmid Inc type and plasmid MLST typing                             | Antibiotic resistance genes (ARGs) |                                         |       |      |      |        |                                                                     |                                   |                                                  |                     |              |                   | Total No. Of ARGs    | Alternations of outer membrane porine genes |                       |                      |                      |           |
|--------------|--------------------|-----------|----------------------------------------------------------------------|------------------------------------|-----------------------------------------|-------|------|------|--------|---------------------------------------------------------------------|-----------------------------------|--------------------------------------------------|---------------------|--------------|-------------------|----------------------|---------------------------------------------|-----------------------|----------------------|----------------------|-----------|
|              |                    |           |                                                                      | Carbapenemase                      | Additional beta-lactam-resistance genes |       |      |      |        | Aminoglycoside                                                      | Fluoroquinolone                   | MLS - Macrolide, Lincosamide and Streptogramin B | Phenicol            | Rifampicin   | Sulphonamide      |                      | Tetracycline                                | Trimethoprim          | <i>ompC</i> (374 aa) | <i>ompF</i> (358 aa) |           |
|              |                    |           |                                                                      |                                    | CMY-                                    | CTX-M | OXA- | TEM- | others |                                                                     |                                   |                                                  |                     |              |                   |                      |                                             |                       |                      |                      |           |
| Survcare050  | <i>C. freundii</i> | 8         | IncFII[F2:A-B-], IncL/M(pOXA-48), TrfA                               | OXA-48                             | 79                                      | 15    | 1    | 1B   |        | <i>aac(3)-IIa, aac(6)-Ib, aadA1</i>                                 | <i>aac(6)Ib-cr, qnrS1</i>         |                                                  | <i>catB3</i>        |              |                   | <i>sul1, sul2</i>    | <i>tet(A), tet(B)</i>                       | <i>dfrA1</i>          | 16                   | 1                    | wild type |
| bk18035705   | <i>C. freundii</i> | 18        | IncA/C2, IncR                                                        | KPC-3                              | 16, 79                                  |       | 10   |      |        | <i>aacA4, aadA1, aadA5, aph(3)-Ic, aph(3)-Vlb, strA, strB</i>       | <i>aac(6)Ib-cr</i>                |                                                  | <i>cmIA1, floR</i>  | <i>ARR-2</i> | <i>sul1, sul2</i> | <i>tet(A)</i>        | <i>dfrA14, dfrA17</i>                       | 20                    | >2                   | wild type            |           |
| NRZ-45233    | <i>C. freundii</i> | 18        | IncHI1A(CIT), IncHI1B(CIT), IncR, IncFII, IncFIB(pHCM2)              | OXA-48                             | 79                                      | 1     | 1    | 1B   | DHA-1  | <i>aadA5</i>                                                        | <i>aac(6)Ib-cr, qnrB4</i>         | <i>mph(A)</i>                                    | <i>catB3</i>        | <i>ARR-3</i> | <i>sul1</i>       |                      |                                             | <i>dfrA17</i>         | 14                   | >2                   | wild type |
| sc18364826   | <i>C. freundii</i> | 18        | IncA/C2, IncR                                                        | KPC-3                              | 16, 79                                  |       | 10   |      |        | <i>aacA4, aadA1, aadA5, aph(3)-Ic, aph(3)-Vlb, strA, strB</i>       | <i>aac(6)Ib-cr</i>                |                                                  | <i>cmIA1, floR</i>  | <i>ARR-2</i> | <i>sul1, sul2</i> | <i>tet(A)</i>        | <i>dfrA14, dfrA17</i>                       | 20                    | >2                   | wild type            |           |
| sc18412584   | <i>C. freundii</i> | 18        | IncA/C2, IncR                                                        | KPC-3                              | 16, 79                                  |       | 10   |      |        | <i>aacA4, aadA1, aadA5, aph(3)-Ic, aph(3)-Vlb, strA, strB</i>       | <i>aac(6)Ib-cr</i>                |                                                  | <i>cmIA1, floR</i>  | <i>ARR-2</i> | <i>sul1, sul2</i> | <i>tet(A)</i>        | <i>dfrA14, dfrA17</i>                       | 20                    | >2                   | wild type            |           |
| Survcare120  | <i>C. freundii</i> | 18        | IncFII, IncR                                                         | OXA-48                             | 79                                      |       | 1    | 1B   | DHA-1  | <i>aadA5</i>                                                        | <i>aac(6)Ib-cr, qnrB4</i>         | <i>mph(A)</i>                                    | <i>catB3</i>        | <i>ARR-3</i> | <i>sul1</i>       |                      |                                             | <i>dfrA17</i>         | 14                   | >2                   | wild type |
| Survcare161  | <i>C. freundii</i> | 18        | IncR, IncFII, IncX1, IncFIB(pHCM2), IncF[F2:A-B-]                    | -                                  | 79                                      |       | 1    | 1B   | DHA-1  | <i>aadA5</i>                                                        | <i>aac(6)Ib-cr, qnrB4</i>         | <i>mph(A)</i>                                    | <i>catB3</i>        | <i>ARR-3</i> | <i>sul1</i>       |                      |                                             | <i>dfrA17</i>         | 12                   | >2                   | wild type |
| Survcare162  | <i>C. freundii</i> | 18        | IncFII[F2:A-B-], IncR, IncX1, IncFIB(pHCM2)                          | OXA-48                             | 79                                      |       | 1    | 1B   |        | <i>aadA5</i>                                                        | <i>aac(6)Ib-cr</i>                | <i>mph(A)</i>                                    | <i>catB3</i>        | <i>ARR-3</i> | <i>sul1</i>       |                      |                                             | <i>dfrA17</i>         | 11                   | >2                   | wild type |
| ur19075683   | <i>C. freundii</i> | 18        | IncA/C2, IncR, ColRNAI                                               | KPC-3                              | 16, 79                                  |       | 10   |      |        | <i>aacA4, aadA1, aadA5, aph(3)-Ic, aph(3)-Vlb, strA, strB</i>       | <i>aac(6)Ib-cr</i>                |                                                  | <i>cmIA1, floR</i>  | <i>ARR-2</i> | <i>sul1, sul2</i> | <i>tet(A)</i>        | <i>dfrA14, dfrA17</i>                       | 20                    | >2                   | wild type            |           |
| Survcare132  | <i>C. freundii</i> | 19        | IncN[pMLST15], IncFII-FI, TrfA                                       | KPC-2                              | 41                                      |       | 1    | 1B   |        | <i>aadA2, aph(3)-Ic, aac(3)-Ild, strA, strB</i>                     | <i>aac(6)Ib-cr, qnrB2</i>         | <i>mph(A)</i>                                    | <i>catB3</i>        | <i>ARR-3</i> | <i>sul1</i>       |                      |                                             | <i>dfrA12, dfrA18</i> | 17                   | >2                   | wild type |
| Survcare188  | <i>C. freundii</i> | 19        | IncR, IncQ1, IncFIB(K), IncFII(S), ColRNAI                           | VIM-2                              | 41                                      | 3     | 1    |      | SHV-31 | <i>aadA2, aph(3)-Ic, strA, strB</i>                                 | <i>aac(6)Ib-cr</i>                | <i>mph(A)</i>                                    | <i>catB3</i>        | <i>ARR-3</i> | <i>sul1, sul2</i> | <i>tet(A)</i>        | <i>dfrA12</i>                               | 17                    | >2                   | wild type            |           |
| Survcare242  | <i>C. freundii</i> | 19        | ColRNAI                                                              | VIM-4                              | 41                                      |       | 10   |      | SHV-12 | <i>aac(3)-Ib, aadA1, aadA2, aadB, strA, strB</i>                    | <i>qnrA1</i>                      |                                                  |                     |              | <i>sul1</i>       |                      | <i>dfrA1, dfrA16</i>                        | 14                    | >2                   | >2                   |           |
| Survcare247  | <i>C. freundii</i> | 19        | IncL/M(pOXA-48), IncHI2, IncHI2A, TrfA                               | OXA-48                             | 41                                      |       |      | 1B   |        | <i>aadA2, aadB, strA, strB</i>                                      | <i>qnrA1</i>                      |                                                  | <i>catA1</i>        |              | <i>sul1, sul2</i> |                      | <i>dfrA16</i>                               | 12                    | >2                   | wild type            |           |
| Survcare315  | <i>C. freundii</i> | 19        | IncL/M(pOXA-48), IncQ1, IncHI2                                       | OXA-48                             | 41                                      |       |      | 1B   | SHV-12 | <i>aac(6)-Ilc, strA, strB</i>                                       |                                   | <i>ere(A)</i>                                    | <i>catA1</i>        |              | <i>sul1, sul2</i> |                      | <i>dfrA18</i>                               | 12                    | >2                   | wild type            |           |
| Survcare316  | <i>C. freundii</i> | 19        | IncL/M(pOXA-48), IncQ1, IncFII(SARC14)                               | OXA-48                             | 41                                      |       |      | 1B   |        | <i>strA, strB</i>                                                   |                                   |                                                  | <i>catA1</i>        |              | <i>sul2</i>       |                      |                                             | 7                     | >2                   | wild type            |           |
| Survcare320  | <i>C. freundii</i> | 19        | IncN[pMLST7-like], TrfA                                              | VIM-1                              | 41                                      |       |      |      |        | <i>aacA4, aadA1, strA, strB</i>                                     | <i>aac(6)Ib-cr</i>                |                                                  |                     |              |                   |                      | <i>dfrA1, dfrA14</i>                        | 9                     | >2                   | wild type            |           |
| Survcare410  | <i>C. freundii</i> | 19        | IncL/M(pOXA-48), IncQ1, IncFII(S), ColRNAI                           | OXA-48                             | 41                                      | 3     |      | 110  |        | <i>strA, strB</i>                                                   |                                   |                                                  | <i>catA1</i>        |              | <i>sul2</i>       |                      |                                             | 7                     | >2                   | >2                   |           |
| NRZ-31836    | <i>C. freundii</i> | 22        | IncN[pMLST15]                                                        | KPC-2                              | 48                                      |       | 1    | 1B   |        | <i>aac(3)-Ild, aadA1, strA, strB</i>                                | <i>aac(6)Ib-cr, qnrB2</i>         | <i>mph(A)</i>                                    | <i>catB3</i>        | <i>ARR-3</i> | <i>sul1</i>       |                      | <i>dfrA18</i>                               | 15                    | >2                   | disrupted            |           |
| NRZ-37969    | <i>C. freundii</i> | 22        | IncN[pMLST15], ColRNAI                                               | KPC-2                              | 48                                      |       | 1    | 1B   |        | <i>aac(3)-Ild, aadA1, strA, strB</i>                                | <i>aac(6)Ib-cr, qnrB2</i>         | <i>mph(A)</i>                                    | <i>catB3</i>        | <i>ARR-3</i> | <i>sul1</i>       | <i>tet(A)</i>        | <i>dfrA1, dfrA18</i>                        | 17                    | >2                   | disrupted            |           |
| NRZ-38954    | <i>C. freundii</i> | 22        | IncN[pMLST15] partial, IncHI2[ST-1], IncN12A                         | KPC-2                              | 48                                      | 9     |      | 1B   |        | <i>aac(3)-Ild, aadB, strA, strB</i>                                 | <i>aac(6)Ib-cr</i>                | <i>mph(A)</i>                                    | <i>catB3</i>        | <i>ARR-3</i> | <i>sul1</i>       |                      | <i>dfrA1, dfrA18</i>                        | 15                    | >2                   | >2                   |           |
| sc17286987   | <i>C. freundii</i> | 22        | IncN3, IncR, TrfA, IncFII, pKPC-CAV1321                              | KPC-2, VIM-4                       | 48                                      |       |      |      |        | <i>aadA24, aph(3)-Vla</i>                                           |                                   | <i>mph(A)</i>                                    | <i>catA1</i>        |              | <i>sul1, sul2</i> |                      | <i>dfrA1</i>                                | 10                    | 1                    | >2                   |           |
| Survcare092  | <i>C. freundii</i> | 22        | IncN[pMLST15], IncHI2A                                               | KPC-2                              | 48                                      | 9     | 1    | 1B   |        | <i>aac(3)-Ild, aadA1, aadA2, aadB, strA, strB</i>                   | <i>aac(6)Ib-cr, qnrB2</i>         | <i>mph(A)</i>                                    | <i>catB3</i>        | <i>ARR-3</i> | <i>sul1</i>       | <i>tet(A)</i>        | <i>dfrA1, dfrA18</i>                        | 20                    | >2                   | disrupted            |           |
| Survcare160  | <i>C. freundii</i> | 22        | IncHI2 [ST-1], IncHI2A, IncN [unknown]                               | -                                  | 48                                      | 9     |      | 1B   |        | <i>aadA1, aadA2, aadB, aac(3)-Ild, strA, strB</i>                   | <i>aac(6)Ib-cr, qnrB2</i>         | <i>mph(A)</i>                                    | <i>ARR-3</i>        | <i>sul1</i>  | <i>tet(A)</i>     | <i>dfrA1, dfrA18</i> | 17                                          | >2                    | disrupted            |                      |           |
| Survcare252  | <i>C. freundii</i> | 22        | IncR, IncHI1B(CIT), IncFIB(pB171), Rep, ColRNAI                      | OXA-48                             | 48                                      |       | 1    |      |        | <i>aadA1</i>                                                        | <i>aac(6)Ib-cr</i>                | <i>mph(A)</i>                                    | <i>catB3</i>        | <i>ARR-3</i> | <i>sul1</i>       | <i>tet(A)</i>        | <i>dfrA1</i>                                | 11                    | >2                   | >2                   |           |
| Survcare429  | <i>C. freundii</i> | 22        | IncX3, IncR, IncFIB(pB171), ColRNAI, Col(MGD2)                       | NDM-5                              | 48                                      |       | 1    | 1B   | DHA-1  | <i>aadA1</i>                                                        | <i>aac(6)Ib-cr, qnrB4</i>         | <i>mph(A)</i>                                    | <i>catB3, floR</i>  | <i>ARR-2</i> | <i>sul1, sul2</i> | <i>tet(A)</i>        | <i>dfrA1</i>                                | 16                    | >2                   | >2                   |           |
| Survcare396  | <i>C. freundii</i> | 91        | IncL/M(pOXA-48), IncA/C2, IncR                                       | OXA-48                             | 65                                      | 15    |      | 1B   |        | <i>aadA16</i>                                                       | <i>aac(6)Ib-cr, qnrB6, qnrB38</i> | <i>mph(A)</i>                                    | <i>ARR-3</i>        | <i>sul1</i>  |                   |                      | wild type                                   | 11                    |                      | >2                   |           |
| NRZ-29912    | <i>C. freundii</i> | 98        | IncN[pMLST15], ColRNAI                                               | KPC-2                              | 84                                      |       | 1    | 1B   |        | <i>aac(3)-Ild, strA, strB</i>                                       | <i>aac(6)Ib-cr, qnrB2, qnrB38</i> | <i>mph(A)</i>                                    | <i>catB3</i>        | <i>ARR-3</i> | <i>sul1</i>       |                      | <i>dfrA18</i>                               | 15                    | 2                    | >2                   |           |
| NRZ-31131    | <i>C. freundii</i> | 98        | IncN[pMLST15], ColRNAI                                               | KPC-2                              | 84                                      |       | 1    | 1B   |        | <i>aac(3)-Ild, aadA1, strA, strB</i>                                | <i>aac(6)Ib-cr, qnrB2, qnrB38</i> | <i>mph(A)</i>                                    | <i>catB3</i>        | <i>ARR-3</i> | <i>sul1</i>       |                      | <i>dfrA18</i>                               | 16                    | 2                    | >2                   |           |
| ur18060060   | <i>C. freundii</i> | 98        | IncN[pMLST15], IncFIA(HI1)                                           | KPC-2                              | 84                                      |       | 1    | 1B   |        | <i>aac(3)-Ild, strA, strB</i>                                       | <i>aac(6)Ib-cr, qnrB2, qnrB38</i> | <i>mph(A)</i>                                    | <i>catB3</i>        | <i>ARR-3</i> | <i>sul1</i>       |                      | <i>dfrA18</i>                               | 15                    | 2                    | >2                   |           |
| Survcare306  | <i>C. freundii</i> | 107       | IncN[pMLST15], Col(BSS12)                                            | KPC-2                              | 48                                      | 15    | 1    |      |        | <i>aadB, aac(3)-Ila</i>                                             | <i>aac(6)Ib-cr, qnrB1</i>         | <i>mph(A)</i>                                    | <i>catA1, catB3</i> | <i>ARR-3</i> | <i>sul1</i>       |                      |                                             | 13                    | >2                   | disrupted            |           |
| Survcare405  | <i>C. freundii</i> | 111       | IncN[pMLST15], IncHI1B(CIT)                                          | KPC-2                              | 65                                      |       | 1    | 1B   |        | <i>aac(3)-Ild, strA, strB</i>                                       | <i>aac(6)Ib-cr, qnrB2, qnrB38</i> | <i>mph(A)</i>                                    | <i>catB3</i>        | <i>ARR-3</i> | <i>sul1</i>       |                      | <i>dfrA18</i>                               | 15                    | wild type            | >2                   |           |
| Survcare239  | <i>C. freundii</i> | 112       | IncL/M(pOXA-48), IncHI2, IncHI2A                                     | OXA-48                             | 75                                      |       |      |      |        | <i>strA, strB</i>                                                   | <i>aac(6)Ib-cr</i>                | <i>ere(A)</i>                                    | <i>catA2</i>        |              | <i>sul1</i>       |                      | <i>dfrA18</i>                               | 9                     | >2                   | wild type            |           |
| NRZ-38718    | <i>C. freundii</i> | 114       | IncN[pMLST15]                                                        | KPC-2                              | 48                                      |       |      | 1B   |        | <i>aac(3)-Ild</i>                                                   |                                   | <i>mph(A)</i>                                    |                     |              |                   |                      |                                             | 5                     | >2                   | wild type            |           |
| Survcare036  | <i>C. freundii</i> | 116       | IncN[pMLST15], IncHI2[ST-1]                                          | KPC-2                              | 65                                      |       | 1    | 1B   | DHA-1  | <i>aac(3)-Ild, aac(6)-Iic, strA, strB</i>                           | <i>aac(6)Ib-cr, qnrB2, qnrB4</i>  | <i>mph(A), ere(A)</i>                            | <i>catB3</i>        | <i>ARR-3</i> | <i>sul1</i>       |                      | <i>dfrA18</i>                               | 18                    | >2                   | wild type            |           |
| Survcare080  | <i>C. freundii</i> | 256       | IncN[pMLST15]                                                        | KPC-2                              | 51                                      |       | 1    | 1B   |        | <i>aac(3)-Ild, strA, strB</i>                                       | <i>aac(6)Ib-cr, qnrB2</i>         | <i>mph(A)</i>                                    | <i>catB3</i>        | <i>ARR-3</i> | <i>sul1</i>       | <i>tet(A)</i>        | <i>dfrA18</i>                               | 15                    | >2                   | wild type            |           |
| Survcare457  | <i>C. freundii</i> | 327       | IncN[pMLST15], ColRNAI                                               | KPC-2                              | 48                                      | 15    | 1    | 1B   |        | <i>aac(6)-Ib, aac(3)-Ild, aac(3)-Ila</i>                            | <i>aac(6)Ib-cr, qnrB2</i>         | <i>mph(A)</i>                                    | <i>catB3</i>        | <i>ARR-3</i> | <i>sul1</i>       | <i>tet(A)</i>        | <i>dfrA18</i>                               | 16                    | >2                   | wild type            |           |
| sc19446287   | <i>C. freundii</i> | 396       | IncFII(S), ColRNAI                                                   | VIM-2                              | 78                                      |       | 17   |      |        | <i>aacA4, aadA1, aadB, aph(3)-Ia</i>                                | <i>aac(6)Ib-cr</i>                |                                                  |                     |              | <i>sul1</i>       |                      |                                             | 9                     | >2                   | >2                   |           |
| Survcare150  | <i>C. freundii</i> | 396       | IncL/M(pOXA-48), IncHI1A(CIT), IncHI1B(CIT), IncFII(SARC14)          | OXA-162                            | 78                                      |       |      | 2    |        |                                                                     |                                   |                                                  |                     |              |                   |                      |                                             |                       | 3                    | >2                   | >2        |
| Survcare165  | <i>C. freundii</i> | 415       | IncN[pMLST15], IncFIB(K), ColRNAI                                    | KPC-2, VIM-1                       | 48                                      |       |      |      |        | <i>aacA4, aadA1, aadA16, aph(3)-Ia, aph(4)-Ia, aac(3)-IVa</i>       | <i>aac(6)Ib-cr, qnrB6</i>         |                                                  | <i>ARR-3</i>        | <i>sul1</i>  |                   |                      | <i>dfrA27</i>                               | 14                    | >2                   | wild type            |           |
| Survcare314  | <i>C. freundii</i> | 488       | IncL/M(pOXA-48), IncN[pMLST6], IncHI1B(A/CIT), ColRNAI               | OXA-48                             | 76                                      | 3     |      |      |        |                                                                     | <i>qnrB38</i>                     |                                                  |                     |              |                   |                      | <i>dfrA14</i>                               | 5                     | >2                   | >2                   |           |
| Survcare137  | <i>C. freundii</i> | 512       | IncHI[ST-11], IncFIB(K), IncHI1A(CIT)                                | NDM-1                              | 65                                      |       | 1    | 1B   |        | <i>aac(3)-Ila, aadA2, aph(3)-Ia, aph(3)-Vla, strA, strB</i>         | <i>aac(6)Ib-cr</i>                | <i>mph(A)</i>                                    | <i>catB3</i>        |              | <i>sul1, sul2</i> | <i>tet(A)</i>        | <i>dfrA12</i>                               | 17                    | >2                   | wild type            |           |
| sc19444294-1 | <i>C. freundii</i> | 540       | IncFIB(pNDM-Mar), IncHI1B                                            | NDM-5                              | 79                                      | 15    |      |      |        | <i>aph(3)-Ia, aph(3)-Vla, armA</i>                                  | <i>qnrS1</i>                      | <i>mph(A), mph(E), msr(E)</i>                    | <i>catA1</i>        |              | <i>sul1</i>       |                      | <i>dfrA5</i>                                | 13                    | >2                   | wild type            |           |
| NRZ-37119    | <i>C. freundii</i> | 584       | IncN[pMLST7]                                                         | VIM-1                              | 79                                      |       |      |      |        | <i>aacA4</i>                                                        | <i>qnrS1</i>                      |                                                  |                     |              |                   | <i>tet(B)</i>        | <i>dfrA14</i>                               | 6                     | >2                   | wild type            |           |
| Survcare311  | <i>C. freundii</i> | New 1     | IncL/M(pOXA-48), TrfA, ColRNAI                                       | OXA-162                            | 75                                      |       |      |      |        | <i>strB, aac(6)-Ib</i>                                              |                                   |                                                  |                     |              | <i>sul2</i>       |                      | <i>dfrA1</i>                                | 6                     | >2                   | wild type            |           |
| Survcare163  | <i>C. freundii</i> | New 2     | IncL/M(pOXA-48), TrfA, IncFII                                        | OXA-48                             | 65                                      | 15    |      |      |        |                                                                     | <i>qnrB38</i>                     |                                                  |                     |              |                   |                      |                                             | 4                     | wild type            | >2                   |           |
| sc17238571   | <i>C. freundii</i> | New 3     | IncHI2 [ST-1], IncFII, IncHI2A, IncFIB(pB171), TrfA, IncF [F2:A-B70] | VIM-2                              | 51                                      | 9     | 1    | 1B   | SHV-12 | <i>aac(3)-Ild, aacA4, aadA2, aadA5, aadB, aph(3)-Ic, strA, strB</i> | <i>aac(6)Ib-cr, qnrA1</i>         | <i>mph(A)</i>                                    | <i>catA1, catB3</i> |              | <i>sul1</i>       |                      | <i>dfrA16, dfrA17</i>                       | 23                    | >2                   | >2                   |           |
| Survcare347  | <i>C. koseri</i>   | NA        | IncN[pMLST15], IncI1[ST-36], ColRNAI, IncFII                         | KPC-2                              |                                         |       | 1    | 1B   | CKO-1  | <i>aac(3)-Ild, strA, strB</i>                                       | <i>aac(6)Ib-cr, qnrB2</i>         | <i>mph(A)</i>                                    | <i>catB3</i>        | <i>ARR-3</i> | <i>sul1</i>       |                      | <i>dfrA18</i>                               | 14                    |                      |                      |           |

|               |                         |         |                                                                         |        |    |   |    |        |                                                                     |                                    |                       |                    |       |                   |                       |                       |    |
|---------------|-------------------------|---------|-------------------------------------------------------------------------|--------|----|---|----|--------|---------------------------------------------------------------------|------------------------------------|-----------------------|--------------------|-------|-------------------|-----------------------|-----------------------|----|
| Survcare397   | <i>C. koseri</i>        | NA      | IncN[pMLST15], ColRNAI                                                  | KPC-2  |    | 1 | 1B | MAL_1  | <i>aac(3)-IId, strA, strB</i>                                       | <i>aac(6')Ib-cr, qnrB2</i>         | <i>mph(A)</i>         | <i>catB3</i>       | ARR-3 | <i>sul1</i>       | <i>dfrA18</i>         | 14                    |    |
| Survcare336   | <i>C. braakii</i>       | 603     | IncL/M(pOXA-48)                                                         | OXA-48 | 83 |   |    |        |                                                                     |                                    |                       |                    |       |                   |                       | 2                     |    |
| Survcare462   | <i>C. braakii</i>       | NA      |                                                                         | -      | 74 |   |    |        |                                                                     | <i>qnrB40</i>                      |                       |                    |       |                   |                       | 2                     |    |
| Survcare083-1 | <i>C. europaeus</i>     | 97      | IncL/M(pMU407)                                                          | VIM-1  |    |   |    | CFE-1  | <i>aacA4, aadA1</i>                                                 | <i>aac(6')Ib-cr, qnrB33</i>        |                       |                    |       | <i>sul1</i>       |                       | 7                     |    |
| Survcare154   | <i>C. europaeus</i>     | New 4   | IncFIA(H1), IncHI1B(R27), IncQ1, IncHI1A, IncHI1[ST-2], IncF[S3*:A8:B-] | VIM-1  |    |   | 1B | CFE-1  | <i>aacA4, aac(3)-IId, aadA2, strA, strB</i>                         | <i>aac(6')Ib-cr, qnrB33</i>        | <i>mph(A)</i>         |                    |       | <i>sul1, sul2</i> | <i>tet(B)</i>         | <i>dfrA12</i>         | 15 |
| Survcare235   | <i>C. portucalensis</i> | 96      | IncFIB(pB171), ColRNAI                                                  | VIM-1  | 46 |   | 1B |        | <i>aadA1, aacA4, aph(3')-XV, aadA2, aac(3)-IId</i>                  | <i>aac(6')Ib-cr, qnrB57</i>        | <i>mph(A)</i>         | <i>catB2</i>       |       | <i>sul1, sul2</i> | <i>tet(D)</i>         | <i>dfrA12</i>         | 16 |
| sc18407397    | <i>C. portucalensis</i> | 232     | IncA/C2, IncHI2 [ST-1], IncQ1,                                          | KPC-3  | 13 | 1 | 1B | SHV-12 | <i>aph(3')-Ia, aac(6')-IId, aac(3)-IId, aph(3')-VIb, strA, strB</i> | <i>aac(6')Ib-cr, qnrB18</i>        | <i>mph(A), ere(A)</i> | <i>catA2, floR</i> |       | <i>sul1, sul2</i> | <i>tet(A), tet(D)</i> | <i>dfrA14, dfrA17</i> | 23 |
| Survcare308   | <i>C. portucalensis</i> | 408     | IncFII, IncFIB(AP001918), ColRNAI, IncF[F2-A20*:B1]                     | NDM-5  | 2  | 1 | 1B |        | <i>aadA5, aac(3)-IIa</i>                                            | <i>aac(6')Ib-cr, qnrB7</i>         | <i>mph(A)</i>         | <i>catB3</i>       |       | <i>sul1</i>       | <i>tet(B)</i>         | <i>dfrA17</i>         | 14 |
| sc18412783    | <i>C. portucalensis</i> | unknown | IncN[pMLST15], ColRNAI                                                  | KPC-2  | 77 | 1 | 1B |        | <i>aac(3)-IId, strA, strB</i>                                       | <i>aac(6')Ib-cr, qnrB2, qnrB42</i> | <i>mph(A)</i>         | <i>catB3</i>       | ARR-3 | <i>sul1</i>       | <i>dfrA18</i>         | 15                    |    |
